# Supplementary material for: Inhibiting the Ca2+ Influx Induced by Human CSF
Source: PubMed Central journal article supplement (PMC5745229; doi:10.1016/j.celrep.2017.11.057), 2017-12-12
Supplement: mmc1.pdf [file mmc1.pdf]

**Supplemental Information**

**Inhibiting the Ca<sup>2+</sup> Influx Induced by Human CSF**

**Anna Drews, Suman De, Patrick Flagmeier, David C. Wirthensohn, Wei-Hsin Chen, Daniel R. Whiten, Margarida Rodrigues, Cécile Vincke, Serge Muyldermans, Ross W. Paterson, Catherine F. Slattery, Nick C. Fox, Jonathan M. Schott, Henrik Zetterberg, Christopher M. Dobson, Sonia Gandhi, and David Klenerman**

## Supplemental Figures:

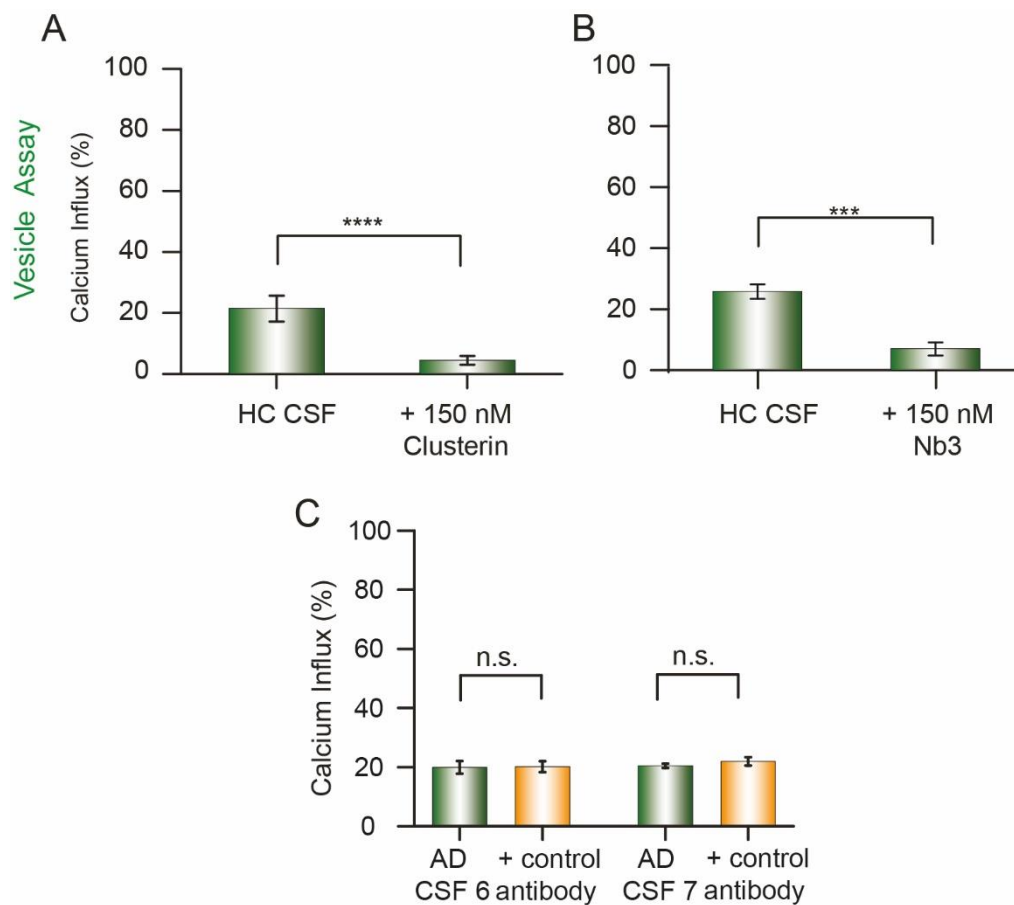

**Figure S1. Assessing the ability of Clusterin and Nb3 to counteract the calcium influx caused by human HC CSF and effect of control anti GFP antibody on CSF induced Calcium influx. Related to Figure 2.** Inhibition of the calcium influx caused by HC CSF with Clusterin **(A)** and Nb3 **(B)**, the error bars represent SEM. The statistical data for the experiments are summarized in Table S1. **(C)** A control antibody, 1  $\mu$ M anti GFP antibody, does not show any significant change in CSF induced Calcium influx.

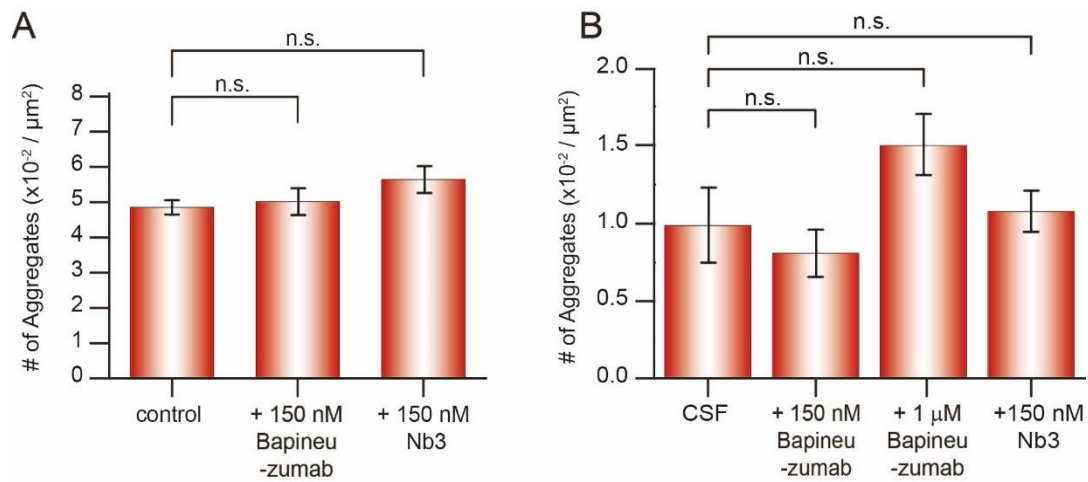

**Figure S2. Effect of Antibodies on Thioflavin T positive A $\beta$ 42 aggregates and human CSF. Related to Figure 3. (A)** A $\beta$ 42 was aggregated at 5  $\mu\text{M}$  for 5h at 37 $^\circ$  C in PBS. An aggregated solution of 1  $\mu\text{M}$  total A $\beta$ 42 monomer concentration was incubated with 150 nM of each antibody for 15 min and aggregates were counted as described previously. Each bar represents the mean of 3 slides with 27 field of views overall imaging a  $3 \times 10^6 \mu\text{m}^2$  area. Error bars represent the standard error of the mean of all 27 field of views **(B)** The effect of the antibodies on the number of ThT positive aggregates in human CSF. The mean of 4 samples with 27 field of views each with the error bars representing the standard error of the mean of all samples. Full statistical details are found in Table S3.

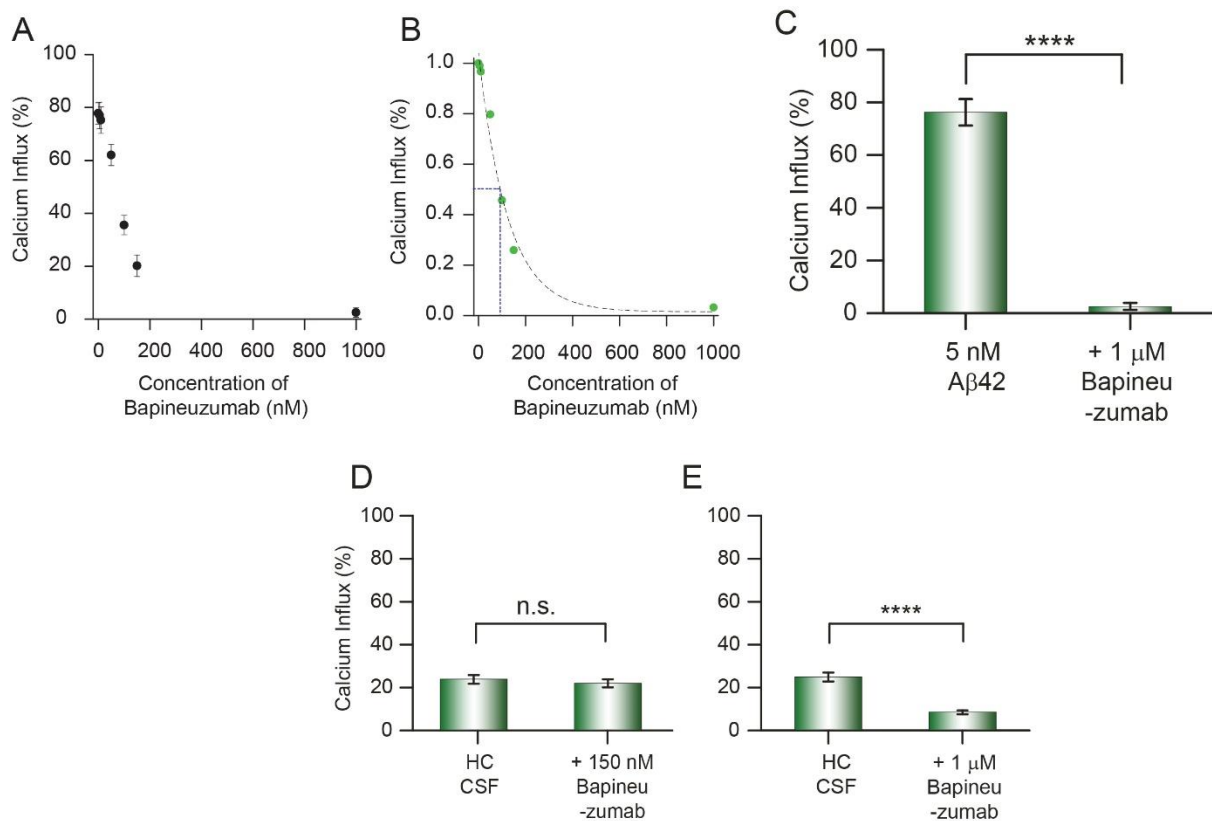

**Figure S3. Inhibition of CSF induced Calcium influx by Bapineuzumab. Related to Figure 3.** Recombinant Aβ42 was incubated at a concentration of 2 μM at 37 °C and an aliquot was taken from the reaction at a time point corresponding to the end of the lag-phase [1]. **(A)** The aliquot was diluted to a concentration of 5 nM and incubated with increasing concentrations of Bapineuzumab. **(B)** The Ca<sup>2+</sup> influx normalized to the influx in the absence of Bapineuzumab. The Ca<sup>2+</sup> influx caused by the Aβ42 aggregates was reduced by half at a concentration of approximately 90 nM of Bapineuzumab (indicated by the blue line). Lines are guides to the eye. **(C)** Inhibition of the calcium influx caused by recombinant Aβ42 aggregates by the antibody Bapineuzumab at a concentration of 1 μM measured with the vesicle assay. Error bars are SEM. **(D)** and **(E)** Inhibition of the calcium influx caused by human HC CSF into vesicles by 150 nM and 1 μM Bapineuzumab respectively. The error bars are SEM.

Supplemental Tables:

Table S1: Statistical data to all vesicle assays Related to Figure 1, 2 and 3.

| Single Vesicle Assay |                                          |                        |                   |          |
|----------------------|------------------------------------------|------------------------|-------------------|----------|
| Figure No.           | Sample                                   | Total vesicle analysed | No of CSF samples | P Value  |
| 1D                   | <i>AD</i>                                | 4906                   | 5                 | 0.440500 |
|                      | <i>HC</i>                                | 4602                   | 5                 |          |
| 2A                   | <i>AD</i>                                | 5032                   | 5                 | 0.000033 |
|                      | <i>AD+ Clusterin</i>                     | 4876                   | 5                 |          |
| Fig. S1A             | <i>HC</i>                                | 4905                   | 5                 | 0.000040 |
|                      | <i>HC+ Clusterin</i>                     | 5536                   | 5                 |          |
| 2B                   | <i>AD</i>                                | 4690                   | 5                 | 0.000016 |
|                      | <i>AD+ Nb3</i>                           | 4883                   | 5                 |          |
| Fig. S1B             | <i>HC</i>                                | 4925                   | 5                 | 0.000110 |
|                      | <i>HC + Nb3</i>                          | 4754                   | 5                 |          |
| 3A                   | <i>A<math>\beta</math>42</i>             | 5826                   | 5                 | 0.000034 |
|                      | <i>A<math>\beta</math>42+ 150nM BAPI</i> | 4869                   | 5                 |          |
| 3B                   | <i>AD</i>                                | 5429                   | 5                 | 0.18411  |
|                      | <i>AD+ 150 nM BAPI</i>                   | 5202                   | 5                 |          |
| 3C                   | <i>AD</i>                                | 5277                   | 5                 | 0.00112  |
|                      | <i>AD+ 1 <math>\mu</math>m BAPI</i>      | 5509                   | 5                 |          |

**Table S2: Statistical data to all cell assays. Related to Figure 1, 2 and 3.**

| <b>Cell Assay</b> |                                     |                         |                          |                |
|-------------------|-------------------------------------|-------------------------|--------------------------|----------------|
| <b>Figure No.</b> | <b>Sample</b>                       | <b>No of Cells used</b> | <b>No of CSF samples</b> | <b>P Value</b> |
| <b>1E</b>         | <i>AD</i>                           | 33                      | 6                        | 0.306118       |
|                   | <i>HC</i>                           | 65                      | 9                        |                |
| <b>2C</b>         | <i>AD</i>                           | 25                      | 4                        | 0.001751       |
|                   | <i>AD+ Clusterin</i>                | 19                      | 4                        |                |
| <b>2D</b>         | <i>AD</i>                           | 33                      | 4                        | 0.000591       |
|                   | <i>AD+ Nb3</i>                      | 24                      | 4                        |                |
| <b>3D</b>         | <i>A<math>\beta</math>42</i>        | 8                       | 1                        | 0.004945       |
|                   | <i>A<math>\beta</math>42 + BAPI</i> | 6                       | 1                        |                |
| <b>3E</b>         | <i>AD</i>                           | 37                      | 4                        | 0.279328       |
|                   | <i>AD + 150 nM BAPI</i>             | 25                      | 4                        |                |
| <b>3F</b>         | <i>AD</i>                           | 31                      | 5                        | 0.166927       |
|                   | <i>AD + 1000 nM BAPI</i>            | 27                      | 5                        |                |

**Table S3: Statistical data to all SAVE measurements. Related to Figure 1.**

| <b>Single Aggregate Measurements</b> |                                  |                                                                            |                          |                |
|--------------------------------------|----------------------------------|----------------------------------------------------------------------------|--------------------------|----------------|
| <b>Figure No.</b>                    | <b>Sample</b>                    | <b>Areas imaged per sample (overall 3 x 10<sup>6</sup> μm<sup>2</sup>)</b> | <b>No of CSF samples</b> | <b>P Value</b> |
| <b>1F</b>                            | <b><i>AD</i></b>                 | 27                                                                         | 19                       | 0.4907         |
|                                      | <b><i>HC</i></b>                 | 27                                                                         | 12                       |                |
| <b>S3A</b>                           | <b><i>Aβ42</i></b>               | 27                                                                         | N/A                      | 0.703221       |
|                                      | <b><i>Aβ42 + BAPI</i></b>        | 27                                                                         | N/A                      |                |
| <b>S3A</b>                           | <b><i>Aβ42</i></b>               | 27                                                                         | N/A                      | 2.05552        |
|                                      | <b><i>Aβ42 + Nb3</i></b>         | 27                                                                         | N/A                      |                |
| <b>S3B</b>                           | <b><i>CSF</i></b>                | 27                                                                         | 4                        | 0.626095       |
|                                      | <b><i>CSF + 150 nM BAPI</i></b>  | 27                                                                         | 4                        |                |
| <b>S3B</b>                           | <b><i>CSF</i></b>                | 27                                                                         | 4                        | 0.289404       |
|                                      | <b><i>CSF + 1000 nM BAPI</i></b> | 27                                                                         | 4                        |                |
| <b>S3B</b>                           | <b><i>CSF</i></b>                | 27                                                                         | 4                        | 0.730615       |
|                                      | <b><i>CSF + 150 nM Nb3</i></b>   | 27                                                                         | 4                        |                |
